# Supplementary material
Source: PubMed Central journal article supplement (PMC2889046)
Supplement: 0913022107_pnas.200913022SI.pdf [file 0913022107_pnas.200913022SI.pdf]

# Supporting Information

Yang and Rannala 10.1073/pnas.0913022107

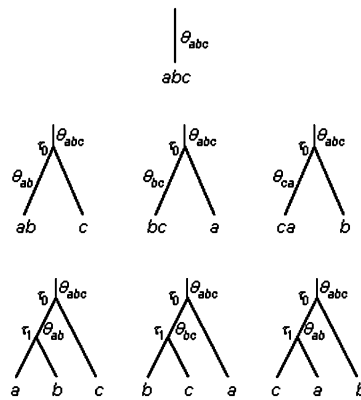

**Fig. S1.** A diagram to illustrate parameters in the general model of species delimitation and phylogenetic inference. For three individuals,  $a$ ,  $b$ , and  $c$ , there are five species delimitations. One of them (*Top*) has one species, three have two species (*Middle*), and one has three species (*Bottom*). For the last species delimitation, there are three distinct phylogenies.

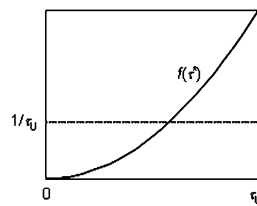

**Fig. S2.** The parabola density for proposing a new value  $\tau^*$  for  $\tau$ , with the uniform distribution (dotted line) shown for comparison.
